# Supplementary material
Source: HighWire-hosted journal article supplement (doi:10.1101/rna.080572.125)
Supplement: SupplementalTable2.xlsx [file SupplementalTable2.xlsx]

## Sheet: Tabelle1
Primer	Sequence	Organism	Function
hSEC31A_E24_for	TGTACGCAGCACAGCACC	human	splice sensitive PCR
hSEC31A_E25_rev	TTCTTCTTTTTGGGTACTCTGTTCAAAG	human	splice sensitive PCR
mSEC31A_E24_for	CTTCCTATTCTGGGCAGCCT	mouse	splice sensitive PCR
mSEC31A_E24_rev	TCTTCGGCACTCTGTTCAGA	mouse	splice sensitive PCR
hGAPDH_for	CTTCGCTCTCTGCTCCTCCTGTTCG	human	RT-qPCR
hGAPDH_rev	ACCAGGCGCCCAATACGACCAAAT	human	RT-qPCR
hRBM47_for	ATTCCTACTGCCGGGATCTA	human	RT-qPCR
hRBM47_rev	TAGCCTGCGTATCCTCCATA	human	RT-qPCR
mHPRT_for	CAACGGGGGACATAAAAGTTATTGGTGGA	mouse	RT-qPCR
mHPRT_rev	TGCAACCTTAACCATTTTGGGGCTGT	mouse	RT-qPCR
mRBM47_for	CGTGGAAAGGGTCAAGAAGAT	mouse	RT-qPCR
mRBM47_rev	TGTGCCGTTGAGGTTGTT	mouse	RT-qPCR
Exon24c_short_for	AAAACCCGGGtaaagtttagaatgtcttcagtaaacactgttaag		cloning
Exon24c_short_rev	tgcatgtgaacttcaaagatgatgatatcCTCGAGAAAA		cloning
Exon24c_long_for	AAAACCCGGGtagggaaacattgttattttaaatatgaag		cloning
Exon24c_long_rev	ctatgtagaaccagaagtttaagaatttgtCTCGAGAAAA		cloning
GFP_splicing_for	CACATGAAGCAGCACGACTT		splice sensitive PCR
GFP_splicing_rev	TCCTTGAAGTCGATGCCCTT		splice sensitive PCR
